# Supplementary material for: Direct Inhibition of the Allergic Effector Response by Raw Cow’s Milk—An Extensive In Vitro Assessment
Source: Cells. 2020 May 19;9(5):1258. doi: 10.3390/cells9051258 (PMC7290799; doi:10.3390/cells9051258)
Supplement: Supplementary file 1 [file cells-09-01258-s001.pdf]

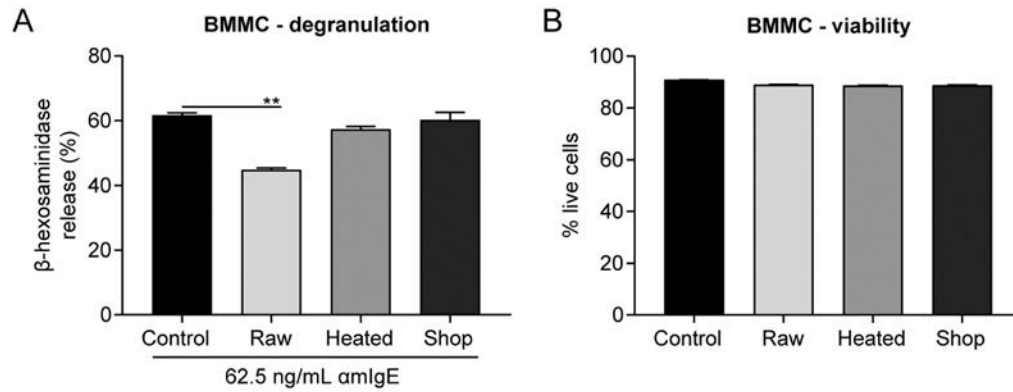

**Figure S1. Mast cell activation in response to IgE cross-linking is reduced by raw milk without affecting cellular viability.** Primary mouse BMMC were incubated overnight with raw milk, heated raw milk, or shop milk before they were primed with IgE and stimulated by 62.5 ng/mL rat anti-mouse IgE mAb. **(A)** β-hexosaminidase release measured in supernatant collected 1 h after αmIgE stimulation. **(B)** Viability of cultured BMMC after overnight milk exposure. Data are presented as mean ± SEM and are representative of three independent experiments. \*\* $P < 0.01$ , compared to the control group as analyzed with one-way ANOVA followed by Dunnett's multiple comparisons test. BMMC, bone marrow-derived mast cells; raw, raw cow's milk; heated, heated raw cow's milk; shop, shop milk; αmIgE, rat anti-mouse IgE.
